# Supplementary material
Source: PubMed Central journal article supplement (PMC7769966)
Supplement: NIHMS1634784-supplement-Supplemental_Material.pdf [file NIHMS1634784-supplement-Supplemental_Material.pdf]

## **SUPPLEMENTAL MATERIALS**

### **KLF4-dependent perivascular plasticity contributes to adipose tissue inflammation**

**Gamze B. Bulut Ph.D.<sup>1</sup>, Gabriel F. Alencar Ph.D.<sup>1</sup>, Katherine M. Owsiany<sup>1</sup>, Anh T. Nguyen Ph.D.<sup>1</sup>, Santosh Karnewar Ph.D.<sup>1</sup>, Ryan M. Haskins Ph.D.<sup>1</sup>, Lillian K. Waller<sup>1</sup>, Olga A. Cherepanova Ph.D.<sup>2</sup>, Rebecca A. Deaton Ph.D.<sup>1</sup>, Laura S. Shankman, Ph.D.<sup>1</sup>, Susanna R. Keller, M.D.<sup>3</sup> and Gary K. Owens Ph.D.<sup>1</sup>**

<sup>1</sup> The Robert M. Berne Cardiovascular Research Center, University of Virginia

<sup>2</sup> Cardiovascular and Metabolic Sciences Lerner Research Institute, Cleveland Clinic

<sup>3</sup> Department of Medicine-Division of Endocrinology and Metabolism, University of Virginia

Short title: Perivascular plasticity and adipose tissue inflammation

Corresponding Author:

Gary K. Owens, Ph.D.

gko@virginia.edu

415 Lane Road PO Box 801394

University of Virginia School of Medicine

Charlottesville, VA 22908

434-924-2652

## SUPPLEMENTAL FIGURE LEGENDS

### **Supplemental Figure I: Myh11-eYFP<sup>+</sup> MΦ marker<sup>+</sup> cells from adipose tissue comprise approximately 5% of adipose MΦs and exhibit M2 polarization.**

Epididymal adipose tissue SVF cells were prepared for flow cytometry, as described in **Figure 1E**, except that mice were switched to DIO diet for 4 weeks at 10 weeks of age. **(A)** Gating strategy for flow cytometry. The percentage of eYFP positive cells were identified within total the MΦ marker, CD45, positive cells. This method showed that only ~5% of adipose tissue CD45<sup>+</sup> cells are present in the eYFP<sup>+</sup> gate. **(B and C)** *Myh11-Cre<sup>ERT2</sup>eYFP* mice received 10 tamoxifen injections in peanut oil between 6 – 8 weeks of age, followed by a 2-week washout period. The mice were fed a normal diet or DIO diet for 6 weeks before tissues were harvested. Body weights **(B)** and adipose tissue weights **(C)** of mice receiving either normal diet or DIO diet were plotted (Mean ± SEM). Data indicate that *Myh11-Cre<sup>ERT2</sup>eYFP* mice responded to the high fat diet as expected. For **(B)** *P* values were determined using unpaired two-tailed *t*-test with Welch's correction. For **(C)** *P* values were determined using an ordinary Two-way ANOVA with alpha = 0.05 followed by Sidak's multiple comparisons post-test. **(D)** M1 versus M2 MΦ classification was done by co-staining cells for CD86 and CD206. About 40% of eYFP<sup>+</sup> MΦ marker<sup>+</sup> cells also express CD206 and exhibit M2 MΦ polarization. AT: adipose tissue. Epi: Epididymal adipose tissue, Subcu: Subcutaneous adipose tissue, Mes: Mesenteric adipose tissue.

### **Supplemental Figure II: Gating strategy applied for flow sorting of cells from Myh11-Cre<sup>ERT2</sup>eYFP mice for single-cell RNA sequencing.**

Representative flow cytometry plots. Viability-dye negative cells were gated to exclude dead cells. FSC-A versus SSC-A gating was applied to exclude debris. Subsequently, FSC-H versus FSC-A gating was applied to exclude doublets. The eYFP FMO gate was set using epididymal adipose tissue SVF cells from a *Myh11-Cre<sup>ERT2</sup>eYFP* control mouse not given IP tamoxifen in peanut oil. Four experimental groups were analyzed: *Myh11-Cre<sup>ERT2</sup>eYFP* SMC-P lineage-tracing mice on normal diet (Group 1, N.D.), or 6 weeks DIO diet (Group 2, "DIO"), as well as SMC-P *Klf4<sup>WT/WT</sup>* on DIO diet (SMC-P *Klf4<sup>WT/WT</sup>* DIO, Group 3), and SMC-P *Klf4<sup>Δ/Δ</sup>* on DIO diet (SMC-P *Klf4<sup>Δ/Δ</sup>* DIO, Group 4) for 6 weeks. For each experimental group, epididymal SVF cells were sorted for four cell-type groups, including eYFP<sup>+</sup>CD45<sup>-</sup>, eYFP<sup>+</sup>CD45<sup>+</sup>CD11b<sup>+</sup>F4/80<sup>+</sup> (eYFP<sup>+</sup> MΦ), eYFP<sup>-</sup>CD45<sup>+</sup>CD11b<sup>+</sup>F4/80<sup>+</sup> (eYFP<sup>-</sup> MΦ), and eYFP<sup>-</sup>CD45<sup>-</sup> cells followed by scRNA-seq library preparation resulting in a total of 16 libraries. For each sample, 2000 cells were targeted with 50,000 reads/cell. A total of 25,356 total cells were analyzed including: N.D. (4,516 cells), DIO (3,995 cells), SMC-P *Klf4<sup>WT/WT</sup>* DIO (8,506 cells), SMC-P *Klf4<sup>Δ/Δ</sup>* DIO (8,339 cells). N.D. diet dataset flow sorting plots are shown.

### **Supplemental Figure III: Myh11-Dre<sup>ERT2</sup>tdTom lineage tracing system validation.**

**(A and B)** *Myh11-Dre<sup>ERT2+/-</sup>tdTom* (Dre<sup>pos</sup>) or *Myh11-Dre<sup>ERT2-/-</sup>tdTom* (Dre<sup>neg</sup>) mice were injected (Tmx. Inj) or not injected (Non-tmx. Inj) with tamoxifen between 6 - 8 weeks of age, and various tissues were harvested at 9 weeks of age for immunostaining with an anti-tdTomato antibody or IgG isotype control. **(A)** *Myh11-Dre<sup>ERT2+/-</sup>tdTom* but not negative control mice treated with tamoxifen show efficient labeling of the

brachiocephalic artery (BCA). **(B)** Quantification of single cell-counting from immunostained BCA regions using confocal microscopy for tdTom<sup>+</sup>/DAPI<sup>+</sup> cells (mean ± SEM) indicating >92% labeling efficiency. *P* values were determined using unpaired two-tailed *t*-test with Welch's correction; *n* = 8 for *Myh11-Dre*<sup>ERT2<sup>+</sup>/+</sup>-tdTom mice treated with tamoxifen, *n* = 3 for *Myh11-Dre*<sup>ERT2<sup>-</sup>/+</sup>-tdTom treated with tamoxifen, and *n* = 4 for *Myh11-Dre*<sup>ERT2<sup>+</sup>/+</sup>-tdTom non-treated with tamoxifen. **(C)** Microvasculature of the liver stained with an anti-tdTomato antibody or IgG isotype control along with an ACTA2-FITC antibody. Pictures show maximum intensity projections of 10 μm confocal z-stacks. Non-tamoxifen injected control, as well as Dre negative tamoxifen injected BCA and liver counterstained with DAPI, were negative for tdTomato staining. Scale bars = 100 μm. **(D)** Microvascular vessels of the retina from *Myh11-Dre*<sup>ERT2<sup>+</sup>/+</sup>-tdTom and *Myh11-Dre*<sup>ERT2<sup>-</sup>/+</sup>-tdTom mice were stained with ACTA2-FITC and imaged for ACTA2 and endogenous tdTomato signal. Results showed high efficiency and SMC-P specific tdTomato labeling of arteries, arterioles, and capillaries. Scale bars = 100 μm **(E)** Aortas were harvested for flow cytometry from *Myh11-Dre*<sup>ERT2<sup>+</sup>/+</sup>-tdTom and *Myh11-Dre*<sup>ERT2<sup>-</sup>/+</sup>-tdTom mice treated with tamoxifen in the diet. Representative flow cytometry plots after gating out dead cells, debris, and doublets illustrating tdTomato positive cells. **(F)** Quantification of the percentage of SMC-P in aortas from *Myh11-Dre*<sup>ERT2<sup>+</sup>/+</sup>-tdTom or *Myh11-Cre*<sup>ERT2<sup>+</sup>/+</sup>-eYFP mice treated with tamoxifen via injections in peanut oil (Inj) or diet (Diet) based on flow cytometry. Values represent mean ± SEM. *P* values were determined using an ordinary Two-way ANOVA with alpha = 0.05 followed by Sidak's multiple comparisons post-test. *Myh11-Cre*<sup>ERT2<sup>+</sup>/+</sup>-eYFP (*n* = 6 Inj; *n* = 6 Diet); *Myh11-Dre*<sup>ERT2<sup>+</sup>/+</sup>-tdTom (*n* = 6 Inj; *n* = 10 Diet).

**Supplemental Figure IV: Peanut oil injections do not result in changes in circulating cytokines.** *Myh11-Cre*<sup>ERT2<sup>+</sup>/+</sup>-eYFP mice received a series of tamoxifen injections in peanut oil for 10 days or were fed tamoxifen diet in normal diet followed by a 2-week standard normal diet, after which blood was harvested for a Luminex assay. Values represent mean ± SEM. *P* values were determined using an ordinary Two-way ANOVA with alpha = 0.05 followed by Sidak's multiple comparisons post-test. Tamoxifen injection group *n* = 7, tamoxifen diet group *n* = 5.

**Supplemental Figure V: Gating strategy applied for flow sorting of cells from *Myh11-Dre*<sup>ERT2<sup>+</sup>/+</sup>-tdTom lineage-tracing mice treated with tamoxifen in diet for single-cell RNA sequencing.** Representative flow cytometry plots for both N.D. (*upper panels*) and DIO diet (*bottom panels*) fed mice. Viability-dye negative cells were gated to exclude dead cells. Subsequently, FSC-H versus FSC-A gating was applied to exclude doublets. The tdTomato FMO gate was set using epididymal adipose tissue SVF cells from a *Myh11-Dre*<sup>ERT2<sup>+</sup>/+</sup>-tdTom lineage tracing control mouse fed a normal diet without tamoxifen. The mice were fed either a normal diet or DIO diet for 6 weeks and then tissues were harvested. Two libraries were prepared for each condition: flow-sorted tdTomato positive cells or unsorted SVF cells resulting in 4 libraries. For each sample, 2000 cells were targeted with 50,000 reads per cell.

**Supplemental Figure VI: SMC-P *Klf4*<sup>Δ/Δ</sup> mice are not resistant to diet-induced obesity, and do not display changes in circulating blood cell types, cytokines or**

**MΦ marker<sup>+</sup> cells in adipose tissue.** SMC-P *Klf4*<sup>WT/WT</sup> and SMC-P *Klf4*<sup>Δ/Δ</sup> mice were injected with tamoxifen in peanut oil and fed DIO diet for indicated times (W – weeks). (A) Graphs of body weight measurements at the time of tissue harvest comparing SMC-P *Klf4*<sup>WT/WT</sup> and SMC-P *Klf4*<sup>Δ/Δ</sup> mice. (B and C) Blood cells (B) or epididymal adipose tissue SVF cell suspensions (C) from SMC-P *Klf4*<sup>WT/WT</sup> and SMC-P *Klf4*<sup>Δ/Δ</sup> mice after six weeks of DIO diet feeding were stained for flow cytometry. (B) Circulating blood cell types were gated as follows: live/singlets/scatter gates were initially applied to remove dead cells, doublets and debris. CD45<sup>+</sup> cells were gated for either CD4 or CD8 cells (excluding double negatives), then frequency of CD4 or CD8 single positive cells plotted. From the same CD45<sup>+</sup> gate, CD11b<sup>+</sup> cells were gated and then the frequency of Ly6c<sup>hi</sup> monocytes and Ly6G<sup>+</sup> neutrophils plotted. CD19<sup>+</sup> out of CD45<sup>+</sup> cells were also plotted. (C) The percentage of CD45<sup>+</sup> cells among live/singlets and MΦ marker positive sub-populations showed no difference between genotypes. (D) Adipocyte size analysis was performed using Adipocount<sup>39</sup> on Hematoxylin and Eosin stained sections of epididymal adipose tissue samples. Representative images of sections from SMC-P *Klf4*<sup>WT/WT</sup> (n=11) and SMC-P *Klf4*<sup>Δ/Δ</sup> mice (n=11) are depicted. Scale bar is 100 μm. The frequency distribution of adipocyte diameter across bins are plotted. *P* value is not significant using a Two-Way ANOVA comparing genotypes. (E) SMC-P *Klf4*<sup>WT/WT</sup> and SMC-P *Klf4*<sup>Δ/Δ</sup> mice received a series of tamoxifen injections in peanut oil for 10 days and subsequently fed DIO diet for six weeks, after which blood was harvested for a Luminex assay. Values represent mean ± SEM. SMC-P *Klf4*<sup>WT/WT</sup> n = 7, SMC-P *Klf4*<sup>Δ/Δ</sup> mice n = 6. (F) The abundance of crown like structures (CLS) were quantified manually using Hematoxylin and Eosin stained sections of epididymal adipose tissue samples from SMC-P *Klf4*<sup>WT/WT</sup> (n=12) and SMC-P *Klf4*<sup>Δ/Δ</sup> mice (n=12). The total number of CLS were divided by the number of sections analyzed per mouse. (G) Total RNA was isolated from epididymal adipose tissue samples using SMC-P *Klf4*<sup>WT/WT</sup> and SMC-P *Klf4*<sup>Δ/Δ</sup> mice and RT-PCR experiments were performed, normalizing the expression of genes to GAPDH. The sequences of all primers used are presented in Supplemental Table 2. Statistical Analysis for (B, C, E, G) Values show mean ± SEM. *P* values were determined using an ordinary Two-way ANOVA with alpha = 0.05 followed by Sidak's multiple comparisons post-test.

**Supplemental Figure VII: eYFP transcript detection-based analysis confirmed that perivascular-specific loss of *Klf4* altered transcriptomic clustering of MΦs and lymphatic endothelial cells.**

(A) Schematic of experimental design. Single-cell RNAseq datasets for SMC-P *Klf4*<sup>WT/WT</sup> and SMC-P *Klf4*<sup>Δ/Δ</sup> mice fed a DIO diet for six weeks (see **Figure 2** for details) were subjected to eYFP transcript detection. After quality control of scRNAseq reads, alignment of reads was performed using the cell ranger software (10x Genomics) against a modified mouse mm10 genome that included a custom eYFP chromosome. For *in silico* correction, eYFP transcript negative cells were removed from eYFP positive flow-sorted libraries and vice versa. (B) Dot plot analysis depicting the expression levels and percentages of cells expressing a pre-determined list of traditional marker genes in each cluster. (C) *Left Panel* - Color-coded UMAP plot for integrated libraries based on eYFP transcript detection depicting 25

clusters. *Middle Panel* - UMAP showing cell origins based on library preparation. *Right Panel* - Feature plot of eYFP transcript distribution. **(D)** UMAP plots comparing cells from SMC-P *Klf4*<sup>WT/WT</sup> (*left panel*) and SMC-P *Klf4*<sup>Δ/Δ</sup> (*middle panel*) mice. *Right panel* shows a feature plot for *Lyve1*, one of the top significantly differentially expressed genes for cluster 13. **(E and F)** Quantification of the frequency distribution of cells within each cluster from indicated libraries. **(G)** SMC-P *Klf4*<sup>WT/WT</sup> and SMC-P *Klf4*<sup>Δ/Δ</sup> mice were labeled with tamoxifen between 6 and 8 weeks of age, and after a 2-week washout period and following six week of DIO diet feeding epididymal adipose tissues were harvested for immunostaining with an anti-LYVE1 antibody. 10 um thick paraffin embedded sections were also co-stained with ACTA2-FITC and DAPI. Confocal z-stack images were acquired on Zeiss 880 microscope and analyzed for LYVE1<sup>+</sup> vessel area. In brief, LYVE1<sup>+</sup> vessel area was manually identified and quantified using Image J. The outline of the LYVE1<sup>+</sup> vessels were drawn as a region of interest and Image J was used to calculate the area measurement after setting the scale using the scale bar measurement. Only structures representing sectioned vessels were included and statistical outliers were excluded from analysis. 1 to 3 sections were analyzed per animal from SMC-P *Klf4*<sup>WT/WT</sup> (n = 8) and SMC-P *Klf4*<sup>Δ/Δ</sup> mice (n = 10). An unpaired *t*-test with Welch's correction yielded *P* = 0.0302.

**Supplemental Figure VIII: Histological analysis of adipose tissue sections from SMC-P *Klf4*<sup>WT/WT</sup> and SMC-P *Klf4*<sup>Δ/Δ</sup> mice reveal changes in ACTA2+ vessel area but no changes in CD31+ cells.** **(A)** SMC-P *Klf4*<sup>WT/WT</sup> and SMC-P *Klf4*<sup>Δ/Δ</sup> mice were labeled with tamoxifen between 6 and 8 weeks of age, and after a 2-week washout period and following six week of DIO diet feeding epididymal adipose tissues were harvested for immunostaining with an anti-CD31 antibody **(A)** or IgG isotype control, or anti-LYVE1 antibody **(D)** or isotype control. Sections were also co-stained with ACTA2-FITC and DAPI. Confocal z-stack images were acquired on a Zeiss 880 microscope and analyzed for pixellation using Image J. Representative images of sections are depicted. Scale bar is 100 um. **(B, C)** Maximum intensity projections were generated using 5 sections for each z-stack and integrated density measurements were obtained using Image J, after defining a region of interest using the DIC image. The integrated density of CD31 pixellation was normalized to IgG controls and plotted as mean ± SEM. Similar to LYVE1<sup>+</sup> vessel area, measurement of ACTA2<sup>+</sup> vessel area was quantified using Image J. For both plots, an unpaired *t*-test with Welch's correction was performed to determine *P* value. **(E - G)** eYFP transcript detection based library from Supp. Fig. 7 was used to generate UMAP plots showing a feature plot for *Pecam1* (*CD31*), *Cdh5*, *Prox1*, *Flt4* (*VEGFR3*) and *Pdpn1* (*Podoplanin1*) as known endothelial or lymphatic endothelial cell markers.

**Supplemental Figure IX: Expression of adipocyte progenitor markers among UMAP transcriptomic clusters.** **(A)** eYFP transcript detection based library from Supp. Fig. 7 was used to generate dot plot analysis depicting the expression levels and percentages of cells expressing a pre-determined list of traditional marker genes relevant for adipocyte progenitor cell types in each cluster. **(B)** Color-coded UMAP plot for integrated libraries based on eYFP transcript detection depicting 25 clusters. **(C-D)** UMAP plots showing feature plots for *Dpp4*, *Pi16*, *Ly6a* (*Sca1*), *Pdgfra* and *Cd9*. **(D)**

The UMAP plots depicting *Pdgfra* and *Cd9* are merged to reveal cells expressing both genes.

**Supplemental Table I:** Differential gene expression analysis of scRNAseq dataset comparing all cells or cluster by cluster.

**Supplemental Table II:** Sequences of RT-PCR primers used in this study.

# SUPPLEMENTAL FIGURES

## Supplemental Fig. I:

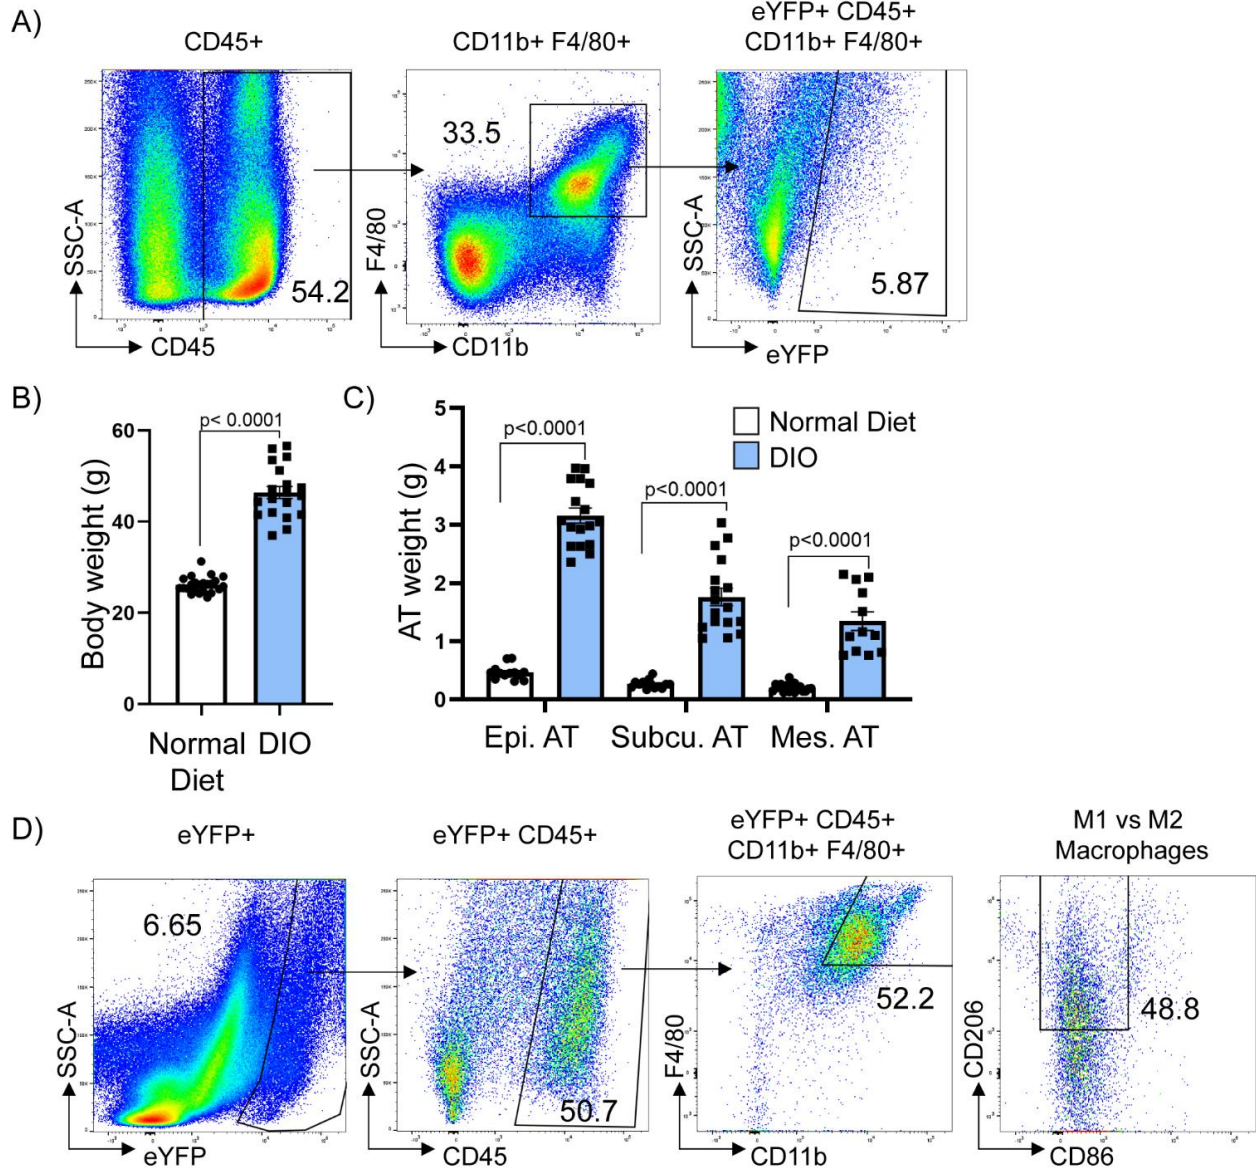

**Supplemental Fig. II:**

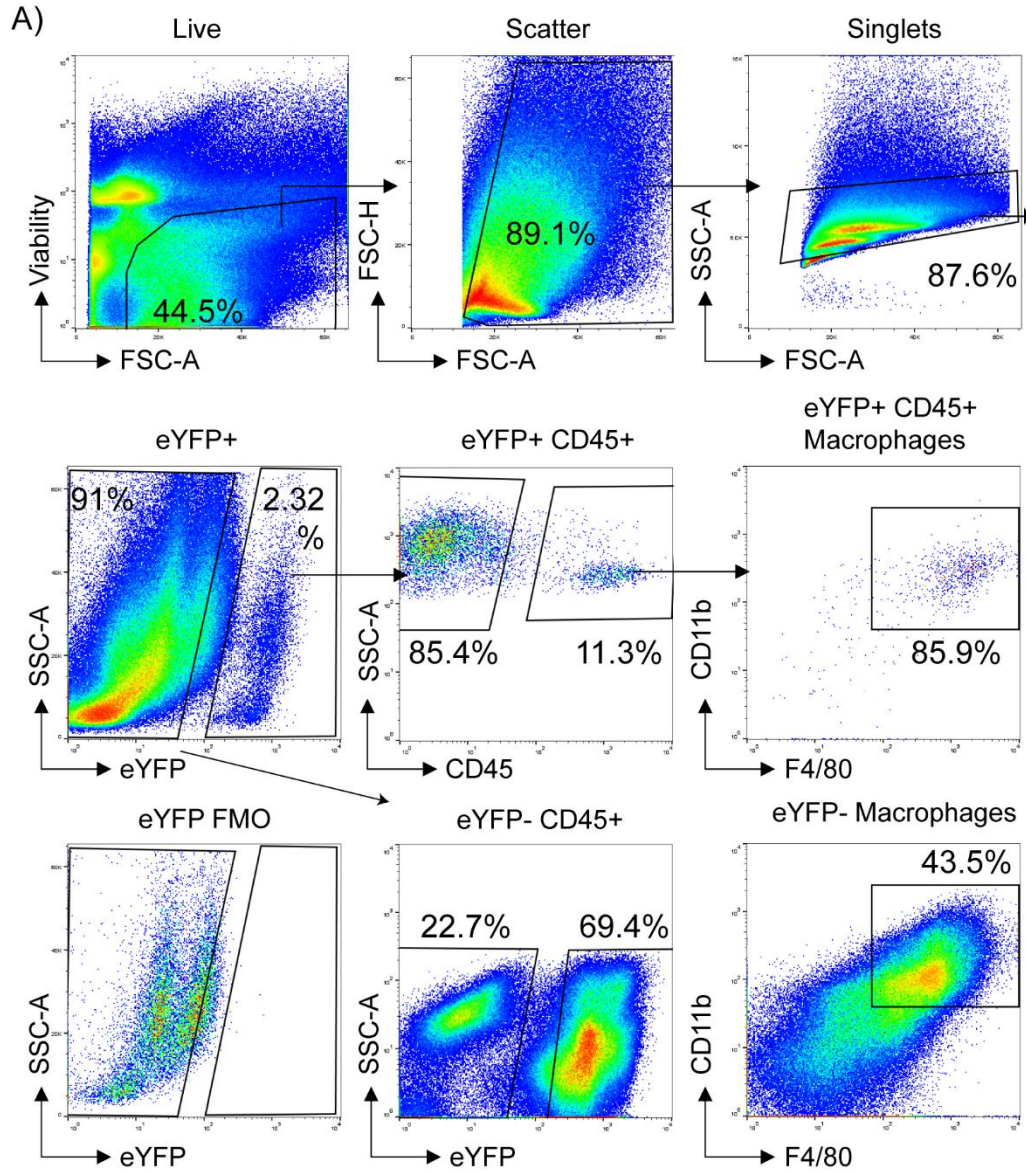



**Supplemental Fig. III:**

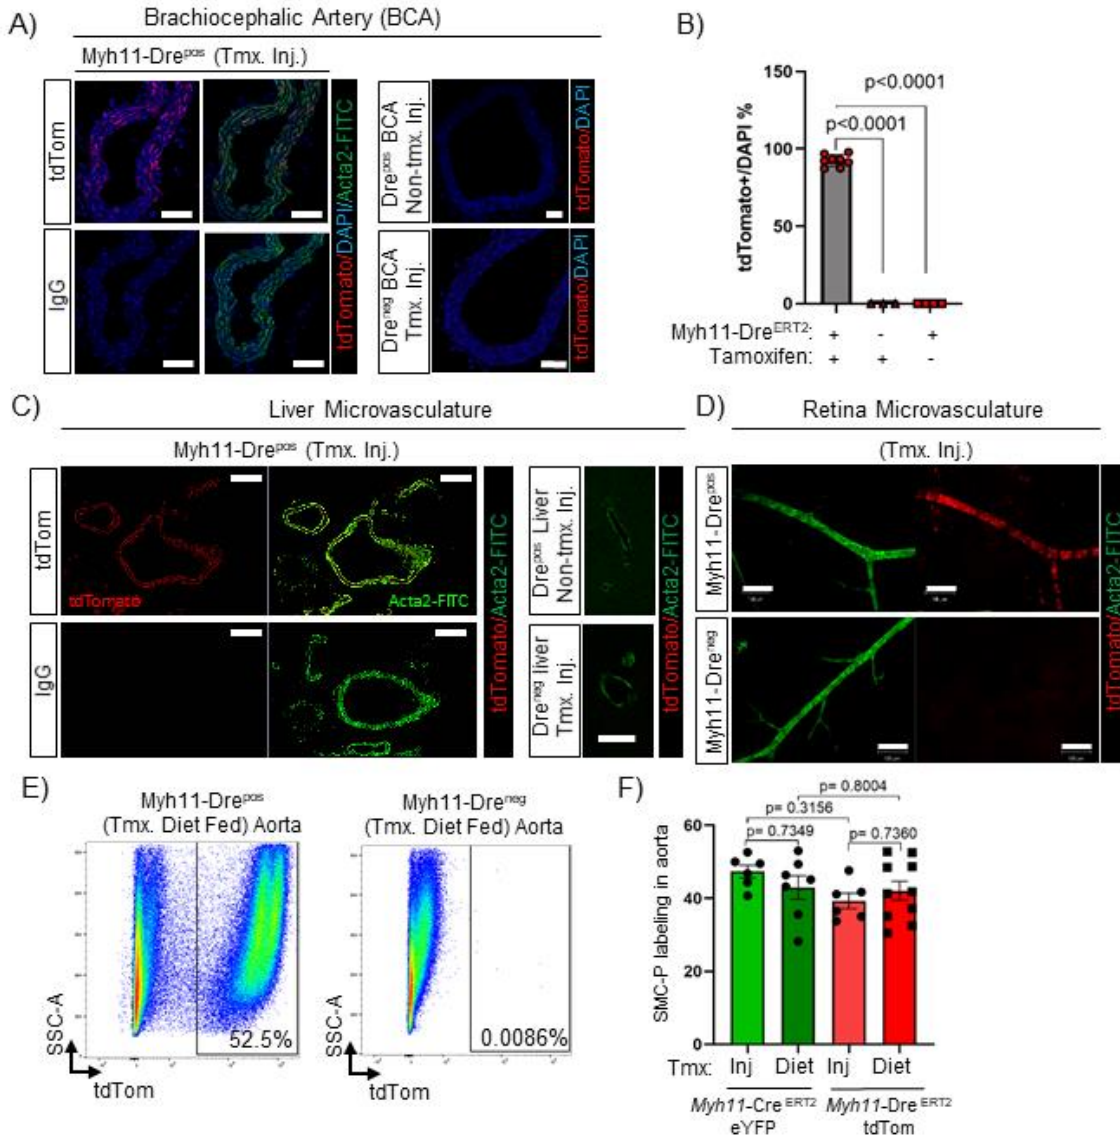

Supplemental Fig. IV:

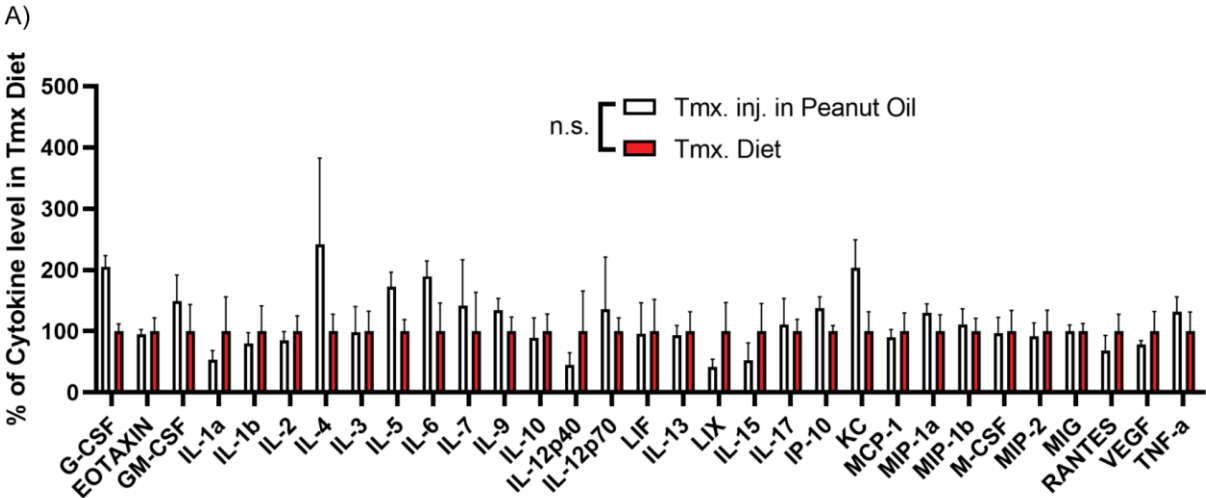

Supplemental Fig. V:

A)

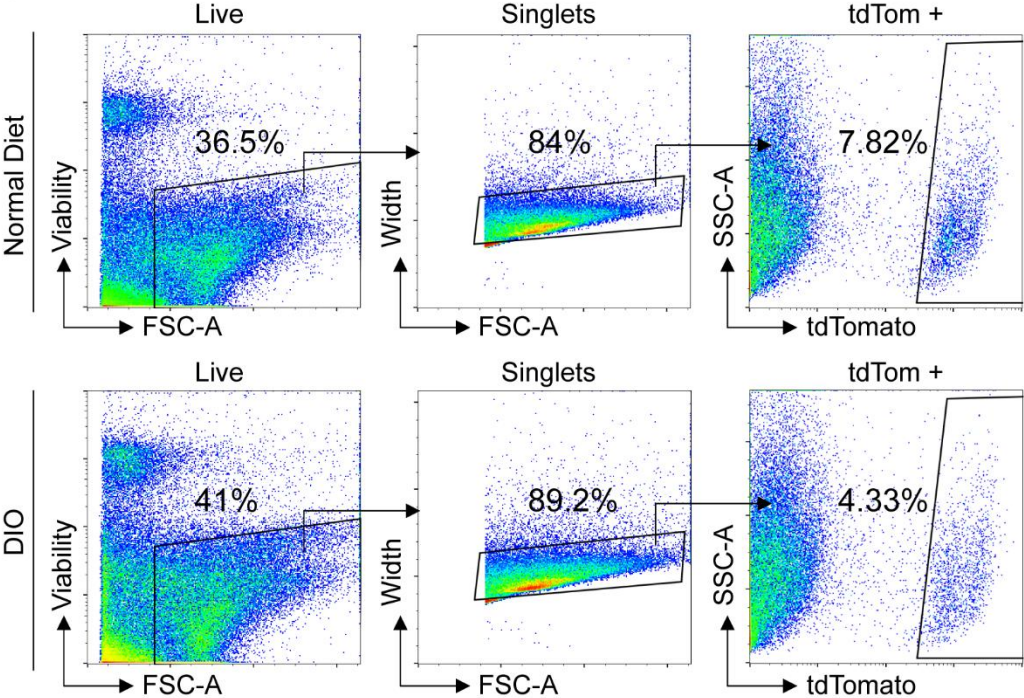

## Supplemental Fig. VI:

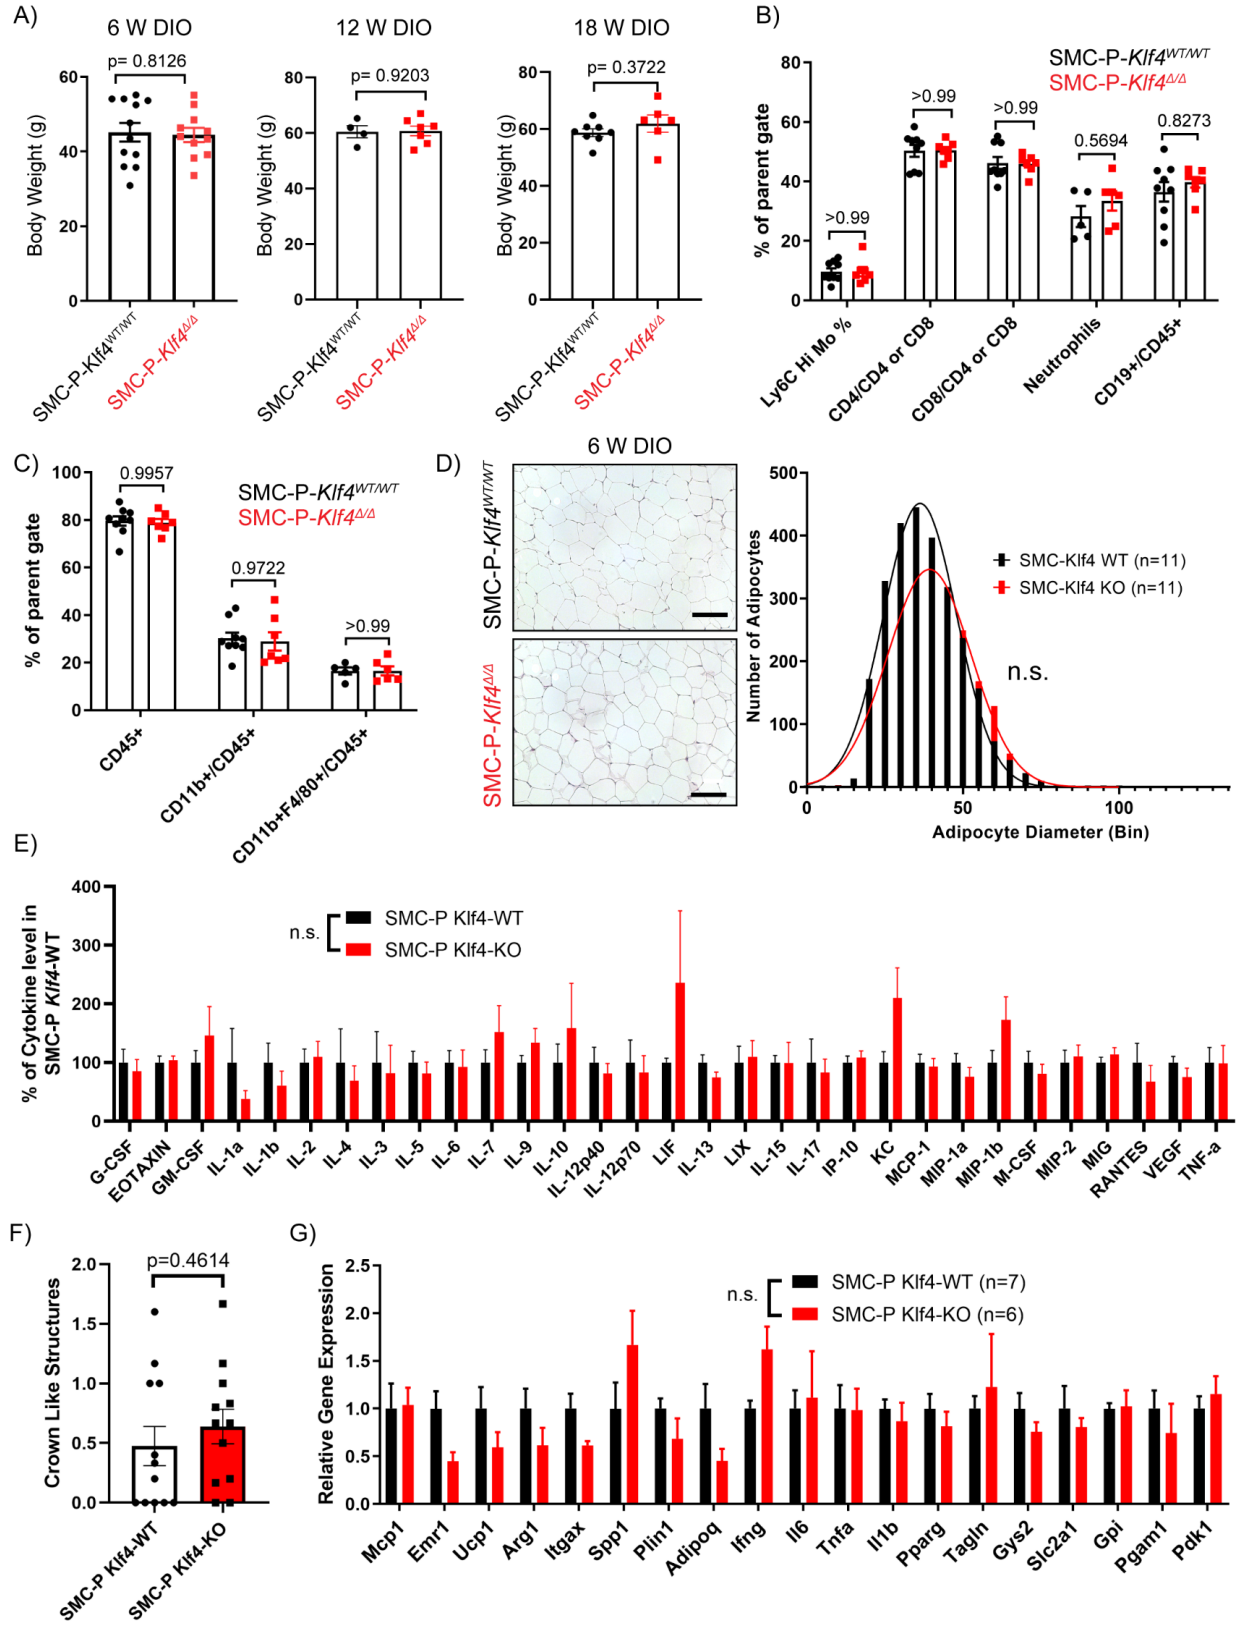

## Supplemental Fig. VII:

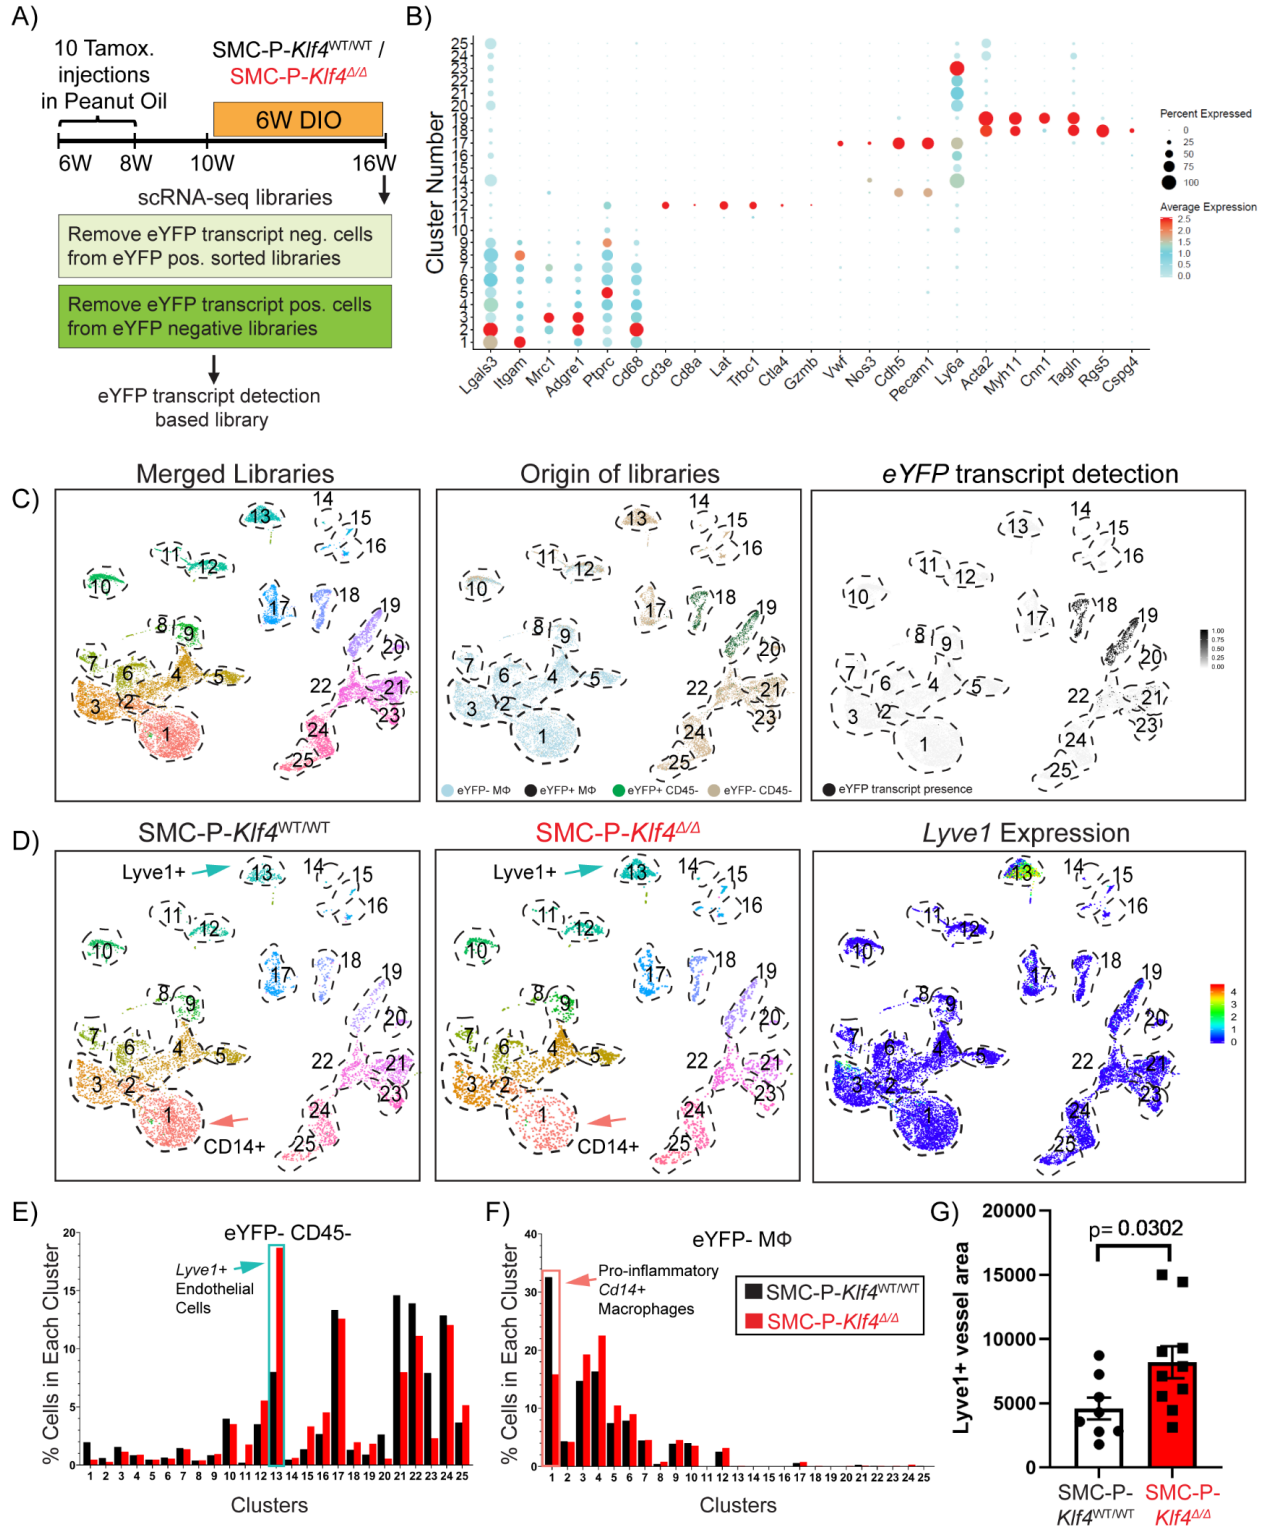

# Supplemental Fig. VIII:

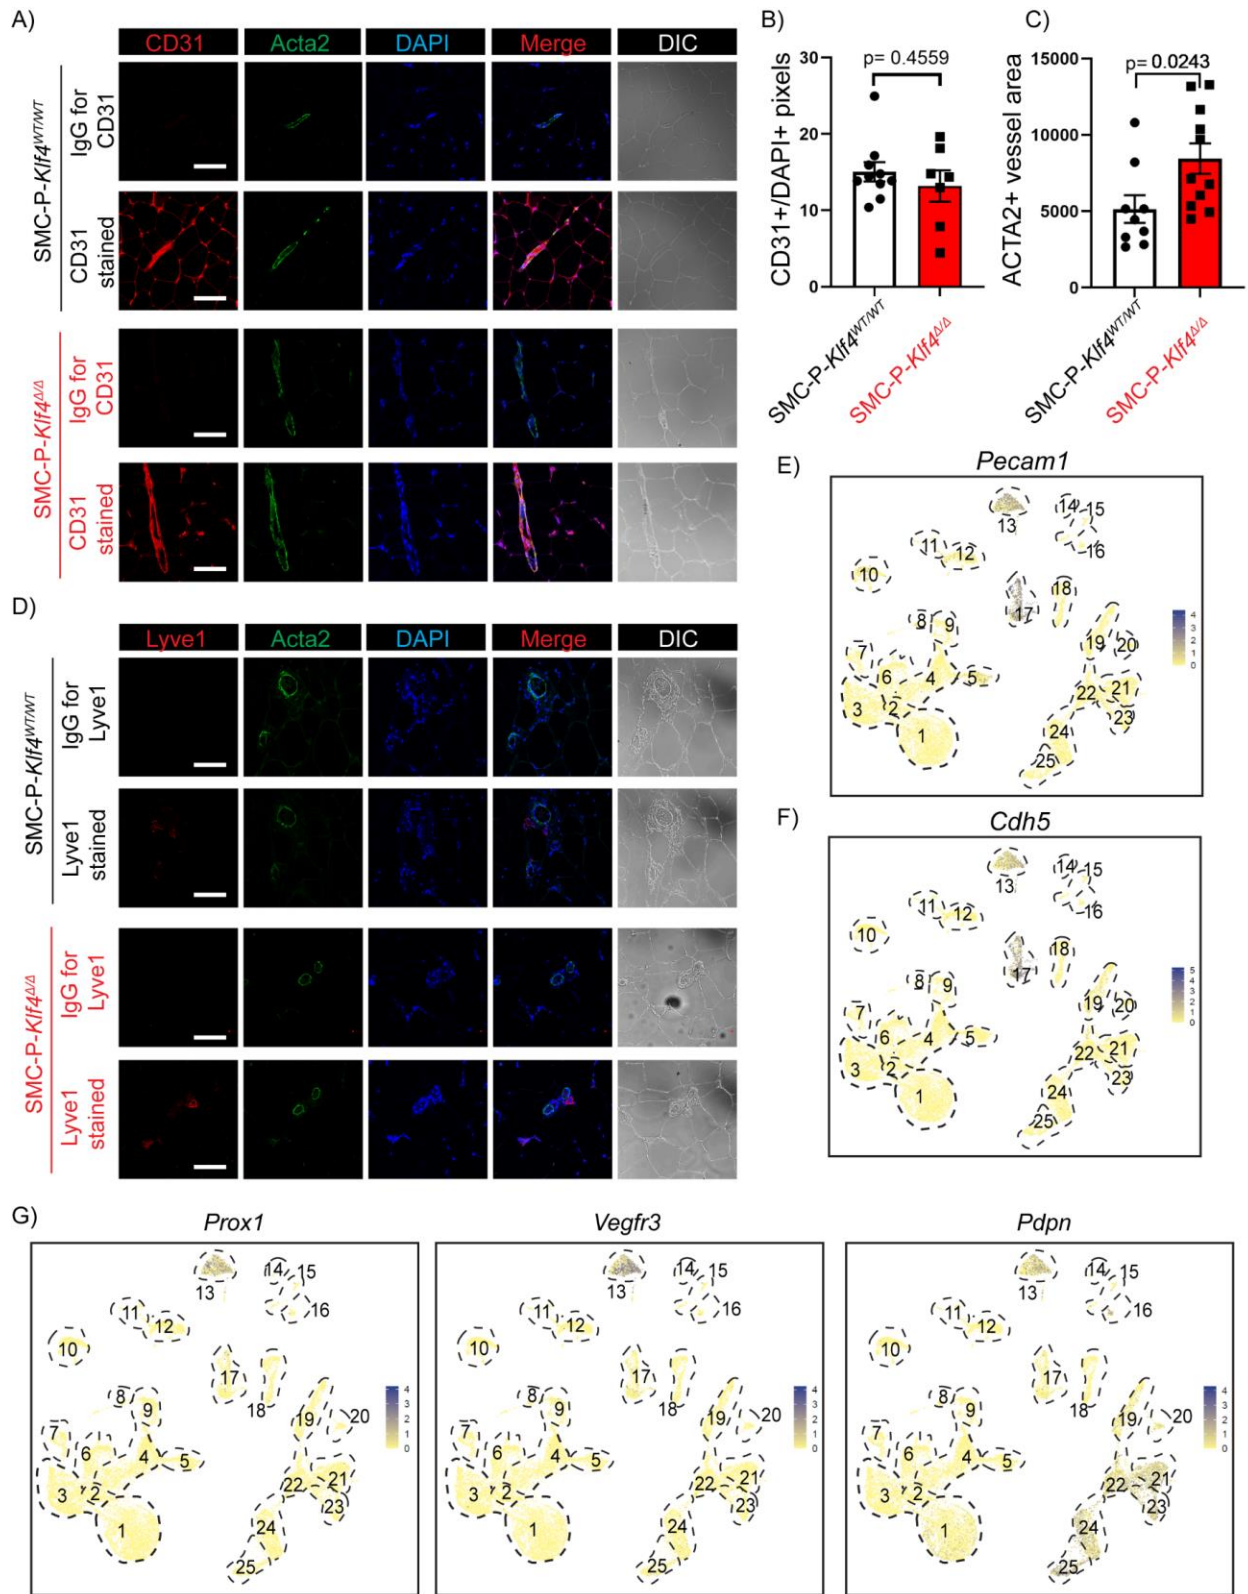

**Supplemental Fig. IX:**

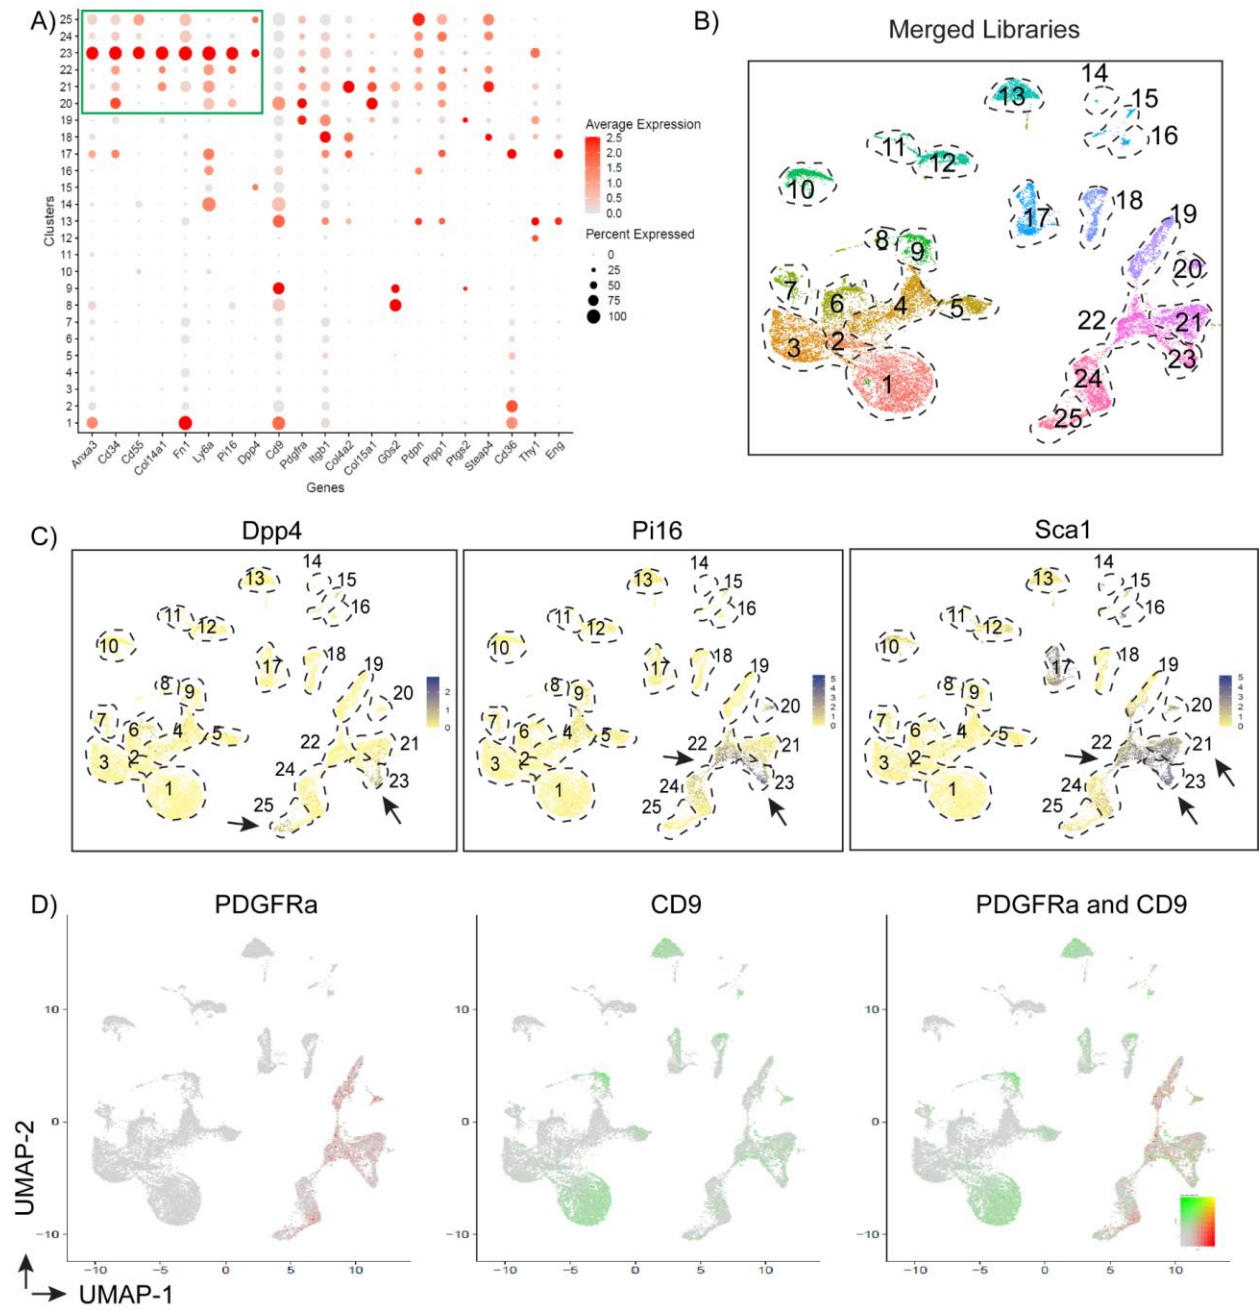

## Major Resources Table

### Genetically Modified Animals

|                                   | Species | Vendor or Source                                         | Background Strain | Other Information                                                       | Persistent ID / URL                                                               |
|-----------------------------------|---------|----------------------------------------------------------|-------------------|-------------------------------------------------------------------------|-----------------------------------------------------------------------------------|
| <b>Transgenic lineage tracing</b> | Mouse   | Owens lab (Ref. Shankman et al <sup>1</sup> )            | C57/Bl6           | <i>Myh11</i> Cre <sup>ERT2</sup> Rosa eYFP                              | Contact corresponding author                                                      |
| <b>Transgenic lineage tracing</b> | Mouse   | Owens lab (Ref. Haskins et al <sup>2</sup> )             | C57/Bl6           | <i>Myh11</i> Cre <sup>ERT2</sup> Rosa eYFP <i>Klf4</i> <sup>Fl/WT</sup> | Contact corresponding author                                                      |
| <b>Transgenic lineage tracing</b> | Mouse   | Owens lab (Ref. Alencar and Owsiany et al <sup>3</sup> ) | C57/Bl6           | <i>Myh11</i> Dre <sup>ERT2</sup>                                        | Contact corresponding author                                                      |
| <b>Inducible Reporter</b>         | Mouse   | Jackson Labs                                             | C57/Bl6           | RosaTomGFP                                                              | <a href="https://www.jax.org/strain/026931">https://www.jax.org/strain/026931</a> |

### Animal Breeding

| Mouse line                                                              | Male                                                                                    | Female                                                                                  |
|-------------------------------------------------------------------------|-----------------------------------------------------------------------------------------|-----------------------------------------------------------------------------------------|
| <i>Myh11</i> Cre <sup>ERT2</sup> Rosa eYFP                              | <i>Myh11</i> Cre <sup>ERT2+</sup> Rosa eYFP <sup>+/+</sup>                              | <i>Myh11</i> Cre <sup>ERT2-</sup> Rosa eYFP <sup>+/+</sup>                              |
| <i>Myh11</i> Cre <sup>ERT2</sup> Rosa eYFP <i>Klf4</i> <sup>Fl/WT</sup> | <i>Myh11</i> Cre <sup>ERT2+</sup> Rosa eYFP <sup>+/+</sup> <i>Klf4</i> <sup>Fl/WT</sup> | <i>Myh11</i> Cre <sup>ERT2-</sup> Rosa eYFP <sup>+/+</sup> <i>Klf4</i> <sup>Fl/WT</sup> |
| <i>Myh11</i> Dre <sup>ERT2</sup> Rosa TomGFP                            | <i>Myh11</i> Dre <sup>ERT2+</sup> Rosa TomGFP <sup>+/+</sup>                            | <i>Myh11</i> Dre <sup>ERT2-</sup> Rosa TomGFP <sup>+/+</sup>                            |
| <i>Myh11</i> Dre <sup>ERT2</sup> Rosa TomGFP                            | <i>Myh11</i> Dre <sup>ERT2-</sup> Rosa TomGFP <sup>+/+</sup>                            | <i>Myh11</i> Dre <sup>ERT2+</sup> Rosa TomGFP <sup>+/+</sup>                            |

### Antibodies

| Target antigen | Vendor or Source | Catalog #   | Working concentration | Persistent ID / URL                                                                                                                                                                                               |
|----------------|------------------|-------------|-----------------------|-------------------------------------------------------------------------------------------------------------------------------------------------------------------------------------------------------------------|
| RFP            | Rockland Labs    | 600-401-379 | 1:100                 | <a href="https://rockland-inc.com/store/Antibodies-to-GFP-and-Antibodies-to-RFP-600-401-379-O4L_24299.aspx">https://rockland-inc.com/store/Antibodies-to-GFP-and-Antibodies-to-RFP-600-401-379-O4L_24299.aspx</a> |
| Acta2-FITC     | Sigma Aldrich    | F3777       | 1:500                 | <a href="https://www.sigmaaldrich.com/catalog/product/sigma/f3777?lang=en&amp;region=US">https://www.sigmaaldrich.com/catalog/product/sigma/f3777?lang=en&amp;region=US</a>                                       |
| CD31           | Abcam            | ab124432    | 1:500                 | <a href="https://www.abcam.com/cd31-antibody-ab124432.html">https://www.abcam.com/cd31-antibody-ab124432.html</a>                                                                                                 |



|                                                |            |            |                 |                                                                                                                                                                                                                                                                                                                                   |
|------------------------------------------------|------------|------------|-----------------|-----------------------------------------------------------------------------------------------------------------------------------------------------------------------------------------------------------------------------------------------------------------------------------------------------------------------------------|
| Lyve1                                          | Abcam      | ab33682    | 1:50            | <a href="https://www.abcam.com/lyve1-antibody-ab33682.html">https://www.abcam.com/lyve1-antibody-ab33682.html</a>                                                                                                                                                                                                                 |
| CD45-BV650                                     | Biolegend  | 103151     | 0.75 ul/ 50 ul  | <a href="https://www.biolegend.com/en-us/products/brilliant-violet-650-anti-mouse-cd45-antibody-11987">https://www.biolegend.com/en-us/products/brilliant-violet-650-anti-mouse-cd45-antibody-11987</a>                                                                                                                           |
| CD45-PE                                        | Biolegend  | 103106     | 0.3 ul/ 50 ul   | <a href="https://www.biolegend.com/en-us/products/pe-anti-mouse-cd45-antibody-100">https://www.biolegend.com/en-us/products/pe-anti-mouse-cd45-antibody-100</a>                                                                                                                                                                   |
| F4/80 PE-Cy7                                   | Biolegend  | 123114     | 0.75 ul/ 50 ul  | <a href="https://www.biolegend.com/en-us/products/pe-cyanine7-anti-mouse-f4-80-antibody-4070">https://www.biolegend.com/en-us/products/pe-cyanine7-anti-mouse-f4-80-antibody-4070</a>                                                                                                                                             |
| CD14-PE                                        | Biolegend  | 150105     | 0.5 ul/ 50 ul   | <a href="https://www.biolegend.com/en-us/products/pe-anti-mouse-cd14-antibody-15675">https://www.biolegend.com/en-us/products/pe-anti-mouse-cd14-antibody-15675</a>                                                                                                                                                               |
| CD11b-PerCP Cy5.5                              | Biolegend  | 101228     | 0.5 ul/ 50 ul   | <a href="https://www.biolegend.com/en-us/products/percp-cyanine5-5-anti-mouse-human-cd11b-antibody-4257">https://www.biolegend.com/en-us/products/percp-cyanine5-5-anti-mouse-human-cd11b-antibody-4257</a>                                                                                                                       |
| CD3-PerCP                                      | BD         | 553067     | 0.625 ul/ 50 ul | <a href="https://www.bdbiosciences.com/eu/applications/research/t-cell-immunology/th-1-cells/surface-markers/mouse/percp-hamster-anti-mouse-cd3e-145-2c11/p/553067">https://www.bdbiosciences.com/eu/applications/research/t-cell-immunology/th-1-cells/surface-markers/mouse/percp-hamster-anti-mouse-cd3e-145-2c11/p/553067</a> |
| CD31-PerCP Cy5.5                               | Biolegend  | 102420     | 0.312 ul/ 50 ul | <a href="https://www.biolegend.com/en-us/products/percp-cyanine5-5-anti-mouse-cd31-antibody-6668">https://www.biolegend.com/en-us/products/percp-cyanine5-5-anti-mouse-cd31-antibody-6668</a>                                                                                                                                     |
| CD31-BV510                                     | BD         | 563089     | 1.5 ul/ 50 ul   | <a href="https://www.bdbiosciences.com/eu/applications/research/stem-cell-research/cancer-research/mouse/bv510-rat-anti-mouse-cd31-mec-133/p/563089">https://www.bdbiosciences.com/eu/applications/research/stem-cell-research/cancer-research/mouse/bv510-rat-anti-mouse-cd31-mec-133/p/563089</a>                               |
| CD86-PerCP                                     | Biolegend  | 105026     | 1.5 ul/ 50 ul   | <a href="https://www.biolegend.com/en-us/products/percp-anti-mouse-cd86-antibody-4277">https://www.biolegend.com/en-us/products/percp-anti-mouse-cd86-antibody-4277</a>                                                                                                                                                           |
| CD206-BV785                                    | Biolegend  | 141729     | 0.625 ul/ 25 ul | <a href="https://www.biolegend.com/en-us/products/brilliant-violet-785-anti-mouse-cd206-mmr-antibody-12013">https://www.biolegend.com/en-us/products/brilliant-violet-785-anti-mouse-cd206-mmr-antibody-12013</a>                                                                                                                 |
| Ly6G-PerCP Cy5.5                               | Biolegend  | 127616     | 0.5 ul/ 50 ul   | <a href="https://www.biolegend.com/en-us/products/percp-cyanine5-5-anti-mouse-ly-6g-antibody-6116">https://www.biolegend.com/en-us/products/percp-cyanine5-5-anti-mouse-ly-6g-antibody-6116</a>                                                                                                                                   |
| Ly6C-BV421                                     | Biolegend  | 128031     | 0.5 ul/ 50 ul   | <a href="https://www.biolegend.com/en-us/products/brilliant-violet-421-anti-mouse-ly-6c-antibody-8586">https://www.biolegend.com/en-us/products/brilliant-violet-421-anti-mouse-ly-6c-antibody-8586</a>                                                                                                                           |
| eBioscience™ Fixable Viability Dye eFluor™ 780 | Invitrogen | 65-0865-14 | 2 ul/ 50 ul     | <a href="https://www.thermofisher.com/order/catalog/product/65-0865-14?SID=srch-srp-65-0865-14#/65-0865-14?SID=srch-srp-65-0865-14">https://www.thermofisher.com/order/catalog/product/65-0865-14?SID=srch-srp-65-0865-14#/65-0865-14?SID=srch-srp-65-0865-14</a>                                                                 |

|                                                                   |               |            |                                        |                                                                                                                                                                                                         |
|-------------------------------------------------------------------|---------------|------------|----------------------------------------|---------------------------------------------------------------------------------------------------------------------------------------------------------------------------------------------------------|
| Sytox Blue                                                        | Invitrogen    | S34857     | Dilute 1:100, then use 20 ul/ 2M cells | <a href="https://www.thermofisher.com/order/catalog/product/S34857#/S34857">https://www.thermofisher.com/order/catalog/product/S34857#/S34857</a>                                                       |
| LIVE/DEAD™ Fixable Red Dead Cell Stain Kit, for 488 nm excitation | Thermo Fisher | L34972     | 1:1000                                 | <a href="https://www.thermofisher.com/order/catalog/product/L34972#/L34972">https://www.thermofisher.com/order/catalog/product/L34972#/L34972</a>                                                       |
| CD11b-APC                                                         | Biolegend     | 101212     | 0.5 ul/ 50 ul                          | <a href="https://www.biolegend.com/en-us/products/apc-anti-mouse-human-cd11b-antibody-345">https://www.biolegend.com/en-us/products/apc-anti-mouse-human-cd11b-antibody-345</a>                         |
| CD19-BV711                                                        |               |            | 0.75 ul/ 50 ul                         |                                                                                                                                                                                                         |
| CD4-PE Cy5.5                                                      | eBioscience   | 35-0042-82 | 0.625 ul/ 50 ul                        | <a href="https://www.thermofisher.com/antibody/product/CD4-Antibody-clone-RM4-5-Monoclonal/35-0042-82">https://www.thermofisher.com/antibody/product/CD4-Antibody-clone-RM4-5-Monoclonal/35-0042-82</a> |
| CD8-PE Cy7                                                        | Biolegend     | 100722     | 0.625 ul/ 50 ul                        | <a href="https://www.biolegend.com/en-us/products/pe-cyanine7-anti-mouse-cd8a-antibody-1906">https://www.biolegend.com/en-us/products/pe-cyanine7-anti-mouse-cd8a-antibody-1906</a>                     |
| UltraComp eBeads™ Compensation Beads                              | Thermo Fisher | 01-2222-42 | 2 drops/ sample                        | <a href="https://www.thermofisher.com/order/catalog/product/01-2222-42#/01-2222-42">https://www.thermofisher.com/order/catalog/product/01-2222-42#/01-2222-42</a>                                       |

## Diet

| Diet Type                       | Cat #                        | Information                                                                    | Persistent ID / URL                                                                                                                                 |
|---------------------------------|------------------------------|--------------------------------------------------------------------------------|-----------------------------------------------------------------------------------------------------------------------------------------------------|
| Tamoxifen red diet 40mg -       | Envigo TD.130856             | Feed instead of Chow diet for 2 weeks and add soft tamoxifen diet 3 times/week | <a href="https://www.envigo.com/tamoxifen-custom-diets">https://www.envigo.com/tamoxifen-custom-diets</a>                                           |
| Standard Laboratory Diet        | Envigo- Teklad 7912          | Teklad LM-485 mouse/rat sterilizable diet (irradiated)                         | <a href="https://www.envigo.com/rodent-traditional-natural-ingredient-diets">https://www.envigo.com/rodent-traditional-natural-ingredient-diets</a> |
| Diet induced obesity diet (DIO) | Research Diets Inc NC0004611 | D12492/ 60% Blue Obesity Diet                                                  | <a href="https://researchdiets.com/formulas/d12492">https://researchdiets.com/formulas/d12492</a>                                                   |

## Data & Code Availability

| Description                                                                                              | Source / Repository | Persistent ID / URL                 |
|----------------------------------------------------------------------------------------------------------|---------------------|-------------------------------------|
| <i>Myh11</i> Cre <sup>ERT2</sup> Rosa eYFP (6W Chow vs 6W DIO) scRNAseq                                  |                     | Code and GEO available upon request |
| <i>Myh11</i> Cre <sup>ERT2</sup> Rosa eYFP <i>Klf4</i> <sup>Fl/WT</sup> (WT vs KO) 6W DIO scRNAseq       |                     | Code and GEO available upon request |
| <i>Myh11</i> Cre <sup>ERT2</sup> Rosa eYFP <i>Klf4</i> <sup>Fl/WT</sup> (WT vs KO) Mesentery Bulk RNAseq |                     | Code and GEO available upon request |

|                                                                        |  |                                           |
|------------------------------------------------------------------------|--|-------------------------------------------|
| <i>Myh11</i> Dre <sup>ERT2</sup> tdTom (6W Chow vs 6W DIO)<br>scRNAseq |  | Code and GEO<br>available upon<br>request |
|------------------------------------------------------------------------|--|-------------------------------------------|

## REFERENCES

1. Shankman, L. S. *et al.* KLF4-dependent phenotypic modulation of smooth muscle cells has a key role in atherosclerotic plaque pathogenesis. *Nat. Med.* (2015). doi:10.1038/nm.3866
2. Haskins, R. M. *et al.* Klf4 has an unexpected protective role in perivascular cells within the microvasculature. *Am. J. Physiol. Circ. Physiol.* (2018). doi:10.1152/ajpheart.00084.2018
3. Alencar, G. F. *et al.* The Stem Cell Pluripotency Genes Klf4 and Oct4 Regulate Complex SMC Phenotypic Changes Critical in Late-Stage Atherosclerotic Lesion Pathogenesis. *Circulation* (2020). doi:10.1161/CIRCULATIONAHA.120.046672
